# Supplementary material for: Comparing the impacts of macronutrients on life-history traits in larval and adult Drosophila melanogaster: the use of nutritional geometry and chemically defined diets
Source: Oxford University Press journal article supplement (doi:10.1242/jeb.181115), 2018-01-01
Supplement: jeb181115supp.pdf [file jeb181115supp.pdf]

**Figure S1.** The relationship between the index and actual measurement of lifetime fecundity recorded from 20 male-female pairs of *D. melanogaster*. Regression line is fitted to indicate that there was a highly positive linear association between the two variables.

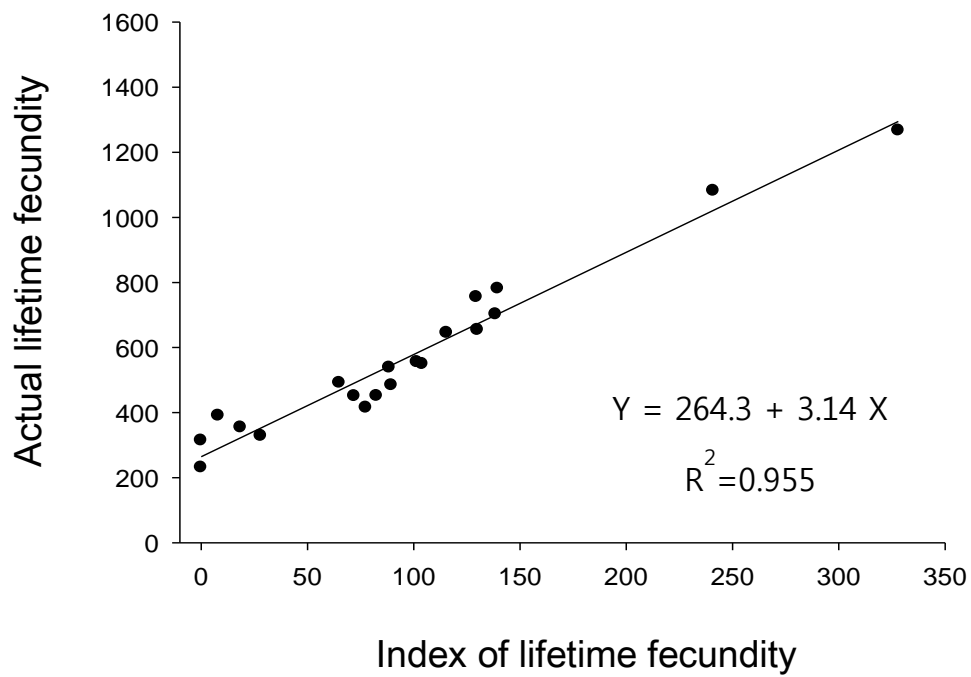

**Figure S2.** Thin plate spline response surface plotted for the body mass of newly eclosed male *D. melanogaster* expressed across 34 chemically defined diets. The highest values of the trait are given dark red and the lowest values are given in dark blue. Contours are indicated by solid lines and the values are written along contours. Diets are indicated as points.

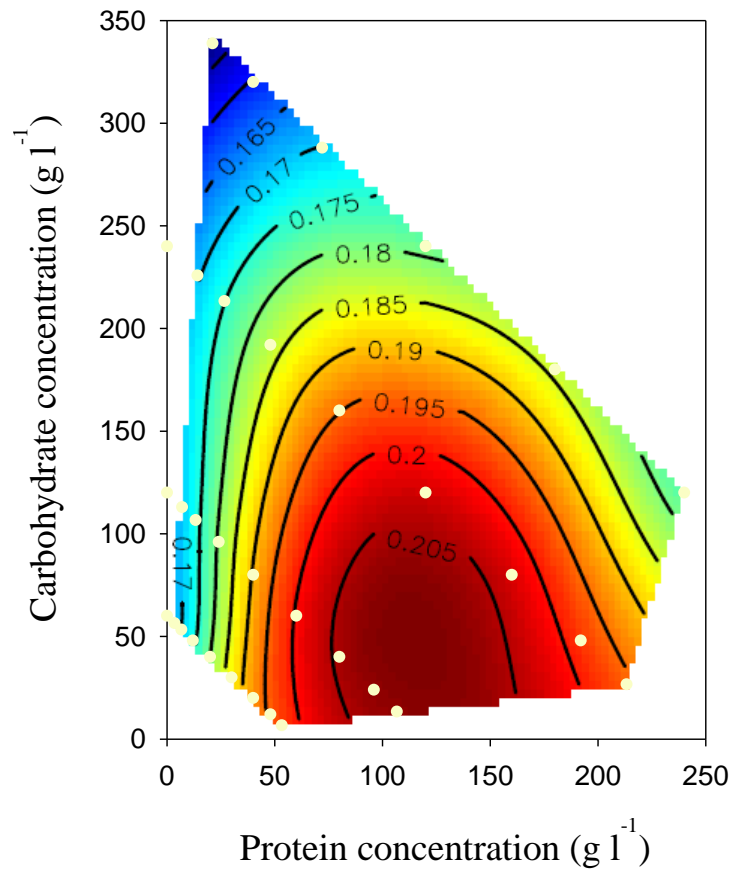

**Table S1. Summary of the mean values of measured life-history traits expressed across 34 chemically defined diets.**

| Dietary composition         |      |                                 |                             | Larval life-history traits    |                                          |                     | Adult life-history traits |                                                 |                       |
|-----------------------------|------|---------------------------------|-----------------------------|-------------------------------|------------------------------------------|---------------------|---------------------------|-------------------------------------------------|-----------------------|
| P+C<br>(g l <sup>-1</sup> ) | P:C  | Protein<br>(g l <sup>-1</sup> ) | CHO<br>(g l <sup>-1</sup> ) | Egg-to-adult<br>viability (%) | Developmental<br>rate (h <sup>-1</sup> ) | Body mass<br>(mg) * | Lifespan<br>(day)*        | Egg production<br>rate (no. day <sup>-1</sup> ) | Lifetime<br>fecundity |
| 360                         | 2:1  | 240                             | 120                         | 62.5                          | 5.108 × 10 <sup>-3</sup>                 | 0.249               | 32.1                      | 2.167                                           | 51.364                |
|                             | 1:1  | 180                             | 180                         | 54.7                          | 4.831 × 10 <sup>-3</sup>                 | 0.291               | 42.5                      | 11                                              | 96.067                |
|                             | 1:2  | 120                             | 240                         | 30.4                          | 3.970 × 10 <sup>-3</sup>                 | 0.266               | 39.6                      | 15.382                                          | 62.917                |
|                             | 1:4  | 72                              | 288                         | 57.5                          | 3.706 × 10 <sup>-3</sup>                 | 0.251               | 40.8                      | 12.567                                          | 36.8                  |
|                             | 1:8  | 40                              | 320                         | 25.5                          | 3.167 × 10 <sup>-3</sup>                 | 0.184               | 52.9                      | 5.55                                            | 33.267                |
|                             | 1:16 | 21.18                           | 338.82                      | 18.1                          | 2.818 × 10 <sup>-3</sup>                 | 0.157               | 44.8                      | 1.117                                           | 7.333                 |
|                             | 0:1  | 0                               | 360                         | 0                             | -                                        | -                   | 23.6                      | 0.25                                            | 2.4                   |
| 240                         | 8:1  | 213.33                          | 26.67                       | 75.8                          | 5.727 × 10 <sup>-3</sup>                 | 0.242               | 14.8                      | 9.873                                           | 35.583                |
|                             | 4:1  | 192                             | 48                          | 71.7                          | 5.709 × 10 <sup>-3</sup>                 | 0.257               | 25.9                      | 16.164                                          | 72.583                |
|                             | 2:1  | 160                             | 80                          | 74.0                          | 5.591 × 10 <sup>-3</sup>                 | 0.281               | 46.1                      | 31                                              | 92.267                |
|                             | 1:1  | 120                             | 120                         | 73.4                          | 5.711 × 10 <sup>-3</sup>                 | 0.303               | 42.5                      | 29.183                                          | 64.929                |
|                             | 1:2  | 80                              | 160                         | 61.8                          | 5.211 × 10 <sup>-3</sup>                 | 0.272               | 55.2                      | 17.509                                          | 46.929                |
|                             | 1:4  | 48                              | 192                         | 65.6                          | 4.767 × 10 <sup>-3</sup>                 | 0.240               | 67.5                      | 5.767                                           | 33.539                |
|                             | 1:8  | 26.67                           | 213.33                      | 64.4                          | 4.005 × 10 <sup>-3</sup>                 | 0.227               | 59.1                      | 3.3                                             | 24.214                |
|                             | 1:16 | 14.18                           | 225.82                      | 31.3                          | 2.667 × 10 <sup>-3</sup>                 | 0.174               | 52.1                      | 1.017                                           | 8.072                 |
| 0:1                         | 0    | 240                             | 0                           | -                             | -                                        | 26.6                | 0.083                     | 2.467                                           |                       |
| 120                         | 8:1  | 106.67                          | 13.33                       | 83.4                          | 6.659 × 10 <sup>-3</sup>                 | 0.271               | 22.8                      | 54                                              | 75.154                |
|                             | 4:1  | 96                              | 24                          | 80.8                          | 7.165 × 10 <sup>-3</sup>                 | 0.279               | 26.7                      | 49.783                                          | 65.786                |
|                             | 2:1  | 80                              | 40                          | 74.5                          | 6.820 × 10 <sup>-3</sup>                 | 0.289               | 38.0                      | 28.95                                           | 64.308                |
|                             | 1:1  | 60                              | 60                          | 73.7                          | 6.971 × 10 <sup>-3</sup>                 | 0.299               | 46.0                      | 17.4                                            | 52.929                |
|                             | 1:2  | 40                              | 80                          | 87.2                          | 6.119 × 10 <sup>-3</sup>                 | 0.285               | 50.5                      | 13.067                                          | 42.5                  |
|                             | 1:4  | 24                              | 96                          | 82.5                          | 5.713 × 10 <sup>-3</sup>                 | 0.274               | 56.2                      | 7.083                                           | 26                    |
|                             | 1:8  | 13.33                           | 106.67                      | 76.3                          | 5.044 × 10 <sup>-3</sup>                 | 0.262               | 53.3                      | 2.983                                           | 10.533                |
|                             | 1:16 | 7.06                            | 112.94                      | 53.7                          | 3.943 × 10 <sup>-3</sup>                 | 0.222               | 57.1                      | 1.417                                           | 5.333                 |
| 0:1                         | 0    | 120                             | 0                           | -                             | -                                        | 31.2                | 0.167                     | 1.467                                           |                       |
| 60                          | 8:1  | 53.33                           | 6.67                        | 82.9                          | 7.192 × 10 <sup>-3</sup>                 | 0.264               | 15.2                      | 31.117                                          | 45.333                |
|                             | 4:1  | 48                              | 12                          | 81.2                          | 7.209 × 10 <sup>-3</sup>                 | 0.269               | 22.8                      | 22.691                                          | 45.077                |
|                             | 2:1  | 40                              | 20                          | 79.8                          | 7.365 × 10 <sup>-3</sup>                 | 0.264               | 31.6                      | 18.9                                            | 62.6                  |
|                             | 1:1  | 30                              | 30                          | 83.8                          | 6.705 × 10 <sup>-3</sup>                 | 0.274               | 33.3                      | 15.117                                          | 49.643                |
|                             | 1:2  | 20                              | 40                          | 82.9                          | 6.392 × 10 <sup>-3</sup>                 | 0.251               | 41.1                      | 6.733                                           | 33.8                  |
|                             | 1:4  | 12                              | 48                          | 54.4                          | 5.661 × 10 <sup>-3</sup>                 | 0.250               | 45.2                      | 3.75                                            | 24.333                |
|                             | 1:8  | 6.67                            | 53.33                       | 49.1                          | 4.428 × 10 <sup>-3</sup>                 | 0.207               | 46.8                      | 1.65                                            | 19.917                |
|                             | 1:16 | 3.53                            | 56.47                       | 30.7                          | 3.228 × 10 <sup>-3</sup>                 | 0.179               | 49.5                      | 1.05                                            | 7.133                 |
| 0:1                         | 0    | 60                              | 0                           | -                             | -                                        | 27.9                | 0.283                     | 1.6                                             |                       |

\*Measured from females only
